# Supplementary material for: CeO2-supported Ni and Co catalysts prepared by a solution combustion method for H2production from glycerol: the effect of fuel/oxidizer ratio and oxygen excess
Source: Royal Society of Chemistry journal article supplement (doi:10.1039/d3cy00854a), 2023-01-01
Supplement: d3cy00854a1.pdf [file d3cy00854a1.pdf]

## Supporting Information

### CeO<sub>2</sub>-supported Ni and Co catalysts prepared by solution combustion method for H<sub>2</sub> production from glycerol: The effect of fuel/oxidizer ratio and oxygen excess

*Anna N. Matveyeva<sup>a\*</sup>, Shamil O. Omarov<sup>a</sup>, Marianna A. Gavrilova<sup>a,b</sup>, Andrey D. Trofimuk<sup>c</sup>,  
Johan Wärnå<sup>d</sup>, Dmitry Yu. Murzin<sup>d\*</sup>*

<sup>a</sup>Laboratory of Materials and Processes for Hydrogen Energy, Ioffe Institute, Politekhnikeskaya ul. 28, 194021 St. Petersburg, Russia

<sup>b</sup>Department of Physical Chemistry, St. Petersburg State Institute of Technology (Technical University), Moskovskiy pr. 26, 190013 St. Petersburg, Russia

<sup>c</sup>Laboratory of Physics for Cluster Structures and Colloid Physics Laboratory, Ioffe Institute, Politekhnikeskaya ul. 28, 194021 St. Petersburg, Russia

<sup>d</sup>Laboratory of Industrial Chemistry and Reaction Engineering, Åbo Akademi University, Henriksgatan 2, 20500 Turku/Åbo, Finland

\*e-mail: anna.matveyeva@mail.ioffe.ru, dmurzin@abo.fi

### Chemical equations used to obtain NiO–CeO<sub>2</sub>

Total valency of glycine: C<sub>2</sub>H<sub>5</sub>NO<sub>2</sub> = 4·2 + 1·5 – 2·2 = +9

Total valency of urea: (NH<sub>2</sub>)<sub>2</sub>CO = 1·4 + 4 – 2 = +6

Total valency of oxidizers: Ce(NO<sub>3</sub>)<sub>3</sub> = 3 – 2·3·3 = –15; Ni(NO<sub>3</sub>)<sub>2</sub> = 2 – 2·3·2 = –10; Co(NO<sub>3</sub>)<sub>2</sub> = 2 – 2·3·2 = –10; NH<sub>4</sub>NO<sub>3</sub> = 1·4 – 2·3 = –2

#### With glycine

1)  $\varphi=0.72$ : 2Ce(NO<sub>3</sub>)<sub>3</sub>(aq) + 2Ni(NO<sub>3</sub>)<sub>2</sub>(aq) + 4C<sub>2</sub>H<sub>5</sub>NO<sub>2</sub> = 2(NiO·CeO<sub>2</sub>) + 7N<sub>2</sub> + 8CO<sub>2</sub> + 3O<sub>2</sub> + (10H<sub>2</sub>O)

2)  $\varphi=1$ : 36Ce(NO<sub>3</sub>)<sub>3</sub>(aq) + 36Ni(NO<sub>3</sub>)<sub>2</sub>(aq) + 100C<sub>2</sub>H<sub>5</sub>NO<sub>2</sub> + 9O<sub>2</sub> = 36(NiO·CeO<sub>2</sub>) + 140N<sub>2</sub> + 200CO<sub>2</sub> + (250H<sub>2</sub>O)

3)  $\varphi=1.25$ : 280Ce(NO<sub>3</sub>)<sub>3</sub>(aq) + 280Ni(NO<sub>3</sub>)<sub>2</sub>(aq) + 972C<sub>2</sub>H<sub>5</sub>NO<sub>2</sub> + 507O<sub>2</sub> = 280(NiO·CeO<sub>2</sub>) + 1186N<sub>2</sub> + 1944CO<sub>2</sub> + (2430H<sub>2</sub>O)

4)  $\varphi=1.4$ : 1040Ce(NO<sub>3</sub>)<sub>3</sub>(aq) + 1040Ni(NO<sub>3</sub>)<sub>2</sub>(aq) + 4044C<sub>2</sub>H<sub>5</sub>NO<sub>2</sub> + 2859O<sub>2</sub> = 1040(NiO·CeO<sub>2</sub>) + 4622N<sub>2</sub> + 8088CO<sub>2</sub> + (10110H<sub>2</sub>O)

5)  $\varphi=1.5$ : 24Ce(NO<sub>3</sub>)<sub>3</sub>(aq) + 24Ni(NO<sub>3</sub>)<sub>2</sub>(aq) + 100C<sub>2</sub>H<sub>5</sub>NO<sub>2</sub> + 81O<sub>2</sub> = 24(NiO·CeO<sub>2</sub>) + 110N<sub>2</sub> + 200CO<sub>2</sub> + (250H<sub>2</sub>O)

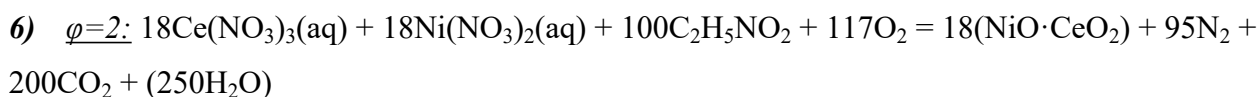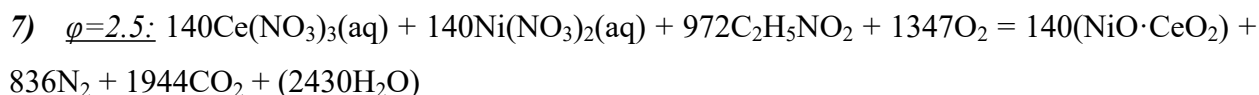

**With glycine and  $\text{NH}_4\text{NO}_3$**

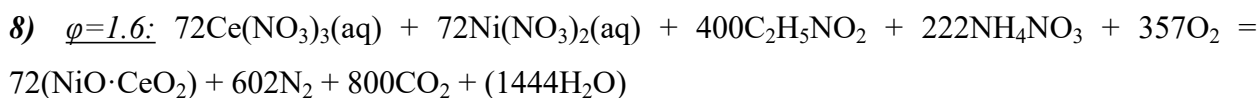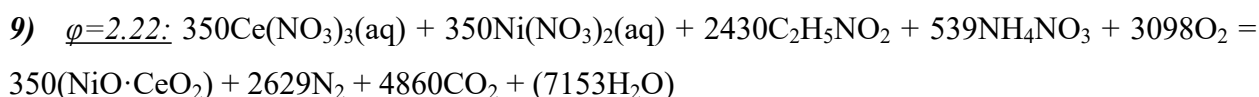

**With urea**

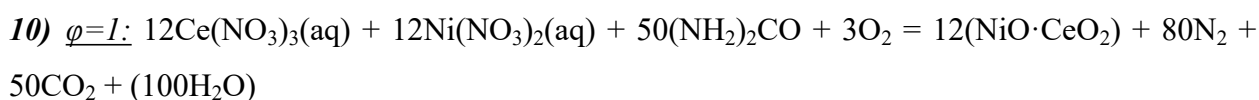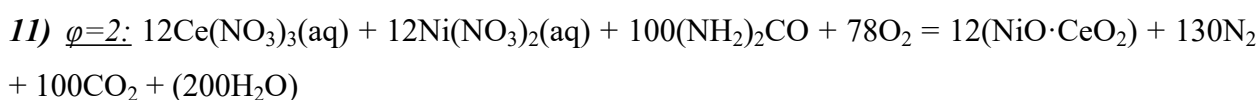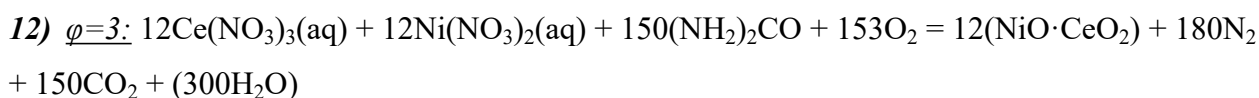

**Chemical equations used to obtain  $\text{CoO-CeO}_2$**

**With glycine**

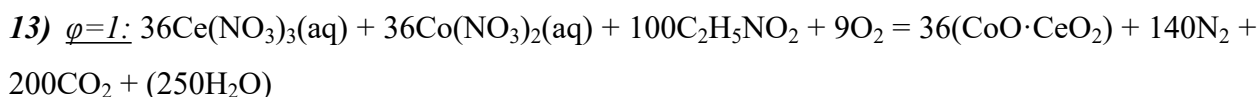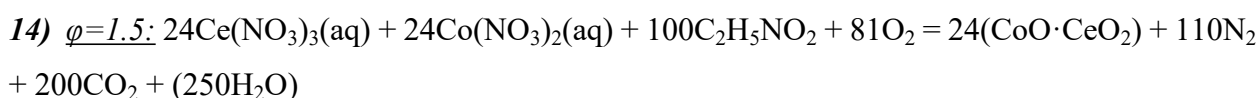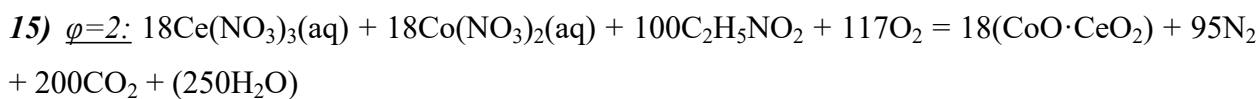

Table S1. Data on the phase composition and crystallinity of the synthesized Ce–Ni–O systems.

| N                  | n(AN)/<br>n(MeN) | $\varphi$ | Phase composition<br>according<br>Rietveld/Corrected <sup>4</sup> ,<br>wt% |               |               | Ni,<br>wt%<br>(TGA <sup>5</sup> ) | Am.<br>NiO <sup>6</sup> ,<br>wt% | D<br>(CeO <sub>2</sub> ),<br>nm | a<br>(CeO <sub>2</sub> ),<br>Å | D<br>(NiO),<br>nm | D<br>(Ni),<br>nm |
|--------------------|------------------|-----------|----------------------------------------------------------------------------|---------------|---------------|-----------------------------------|----------------------------------|---------------------------------|--------------------------------|-------------------|------------------|
|                    |                  |           | CeO <sub>2</sub>                                                           | NiO           | Ni            |                                   |                                  |                                 |                                |                   |                  |
| Fuel – glycine     |                  |           |                                                                            |               |               |                                   |                                  |                                 |                                |                   |                  |
| 1                  | –                | 0.72      | 79/67                                                                      | 21/33         | 0             | 0                                 | 12                               | 6.5                             | 5.4190                         | 6.4               | –                |
| 2 <sup>1</sup>     | –                | 1         | 71/67                                                                      | 24/32         | 5/1           | 1.4                               | 8                                | 35.2                            | 5.4112                         | 29.1              | 18.7             |
| 3-1 <sup>1</sup>   | –                | 1.25      | 70/67                                                                      | 30/33         | 0             | 0                                 | 3                                | 29.9                            | 5.4105                         | 25.9              | –                |
| 3-2 <sup>1,2</sup> |                  |           | 72/67                                                                      | 8/24          | 20/9          | 8.9                               | 16                               | 26.8                            | 5.4120                         | 13.0              | 17.0             |
| 4-1 <sup>2</sup>   | –                | 1.4       | 72/67                                                                      | 23/32         | 5/1           | 1.1                               | 9                                | 20.0                            | 5.4154                         | 13.4              | 13.1             |
| 4-2 <sup>1</sup>   |                  |           | 70/67                                                                      | 30/33         | 0             | 0                                 | 3                                | 25.9                            | 5.4111                         | 22.1              | –                |
| 5-1 <sup>1</sup>   | –                | 1.5       | 72/67                                                                      | 21/31         | 7/2           | 1.6                               | 10                               | 18.2                            | 5.4149                         | 9.8               | 8.9              |
| 5-2 <sup>1,3</sup> |                  |           | 75/67                                                                      | 9/29          | 16/4          | 4.1                               | 20                               | 21.1                            | 5.4141                         | 7.7               | 14.3             |
| 6-1                | –                | 2         | 73/67                                                                      | 27/33         | 0             | 0                                 | 6                                | 7.0                             | 5.4194                         | 6.1               | –                |
| 6-2 <sup>3</sup>   |                  |           | 79/67                                                                      | 0/29          | 21/4          | 3.6                               | 29                               | 9.5                             | 5.4185                         | –                 | 4.8              |
| 7                  | –                | 2.5       | 74/67                                                                      | 26/33         | 0             | 0                                 | 7                                | 4.5                             | 5.4188                         | 4.7               | –                |
| 8 <sup>1</sup>     | 1.54             | 1.6       | 70/67                                                                      | 23/32         | 7/1           | 0.5                               | 9                                | 28.8                            | 5.4099                         | 21.1              | 3.9              |
| 9-1                | 0.77             | 2.22      | 73/67                                                                      | 27/33         | 0             | 0                                 | 6                                | 8.8                             | 5.4189                         | 6.7               | –                |
| 9-2 <sup>3</sup>   |                  |           | 81/67                                                                      | 0/32          | 19/1          | 1.1                               | 32                               | 10.2                            | 5.4178                         | –                 | 3.5              |
| Fuel – urea        |                  |           |                                                                            |               |               |                                   |                                  |                                 |                                |                   |                  |
| 10 <sup>3</sup>    | –                | 1         | 77/67                                                                      | 23/33         | 0/0           | 0                                 | 10                               | 6.6                             | 5.4093                         | 17.0              | –                |
| 11 <sup>1,3</sup>  | –                | 2         | 71/67                                                                      | 11/21         | 18/12         | 11.7                              | 10                               | 33.3                            | 5.4110                         | 11.2              | 25.7             |
| 12 <sup>1,3</sup>  | –                | 3         | 71/67                                                                      | 19/no<br>data | 10/no<br>data | No data                           | No<br>data                       | 15.3                            | 5.4133                         | 10.4              | 7.6              |

Note: <sup>1</sup>the sample contains traces of the CeNiO<sub>3</sub> phase; <sup>2</sup>the sample left in the beaker; <sup>3</sup>immediately after the completion of the combustion process, the beaker was covered with a Petri dish to prevent oxidation of solid products; <sup>4</sup>taking into account amorphous nickel oxide and TGA results; <sup>5</sup>was calculated from the weight gain of the sample during heating, equal to the mass of oxygen involved in the oxidation of nickel according to the equation  $2\text{Ni} + \text{O}_2 = 2\text{NiO}$ ; <sup>6</sup>the amount of amorphous NiO is equal to the difference between the total amount (according to stoichiometry, no more than 33 wt%) and crystalline (determined by the Rietveld method); n(AN) is the number of moles of ammonium nitrate; n(MeN) is the number of moles of cerium and nickel nitrates;  $\varphi$  is the fuel-to-oxidizer ratio; the ratio of weighted ( $R_{wp}$ ) and expected ( $R_e$ ) R-factors was 0.97–1.12, which characterizes goodness of fit (if the square value is equal to one or constant, the refinement procedure is completed).

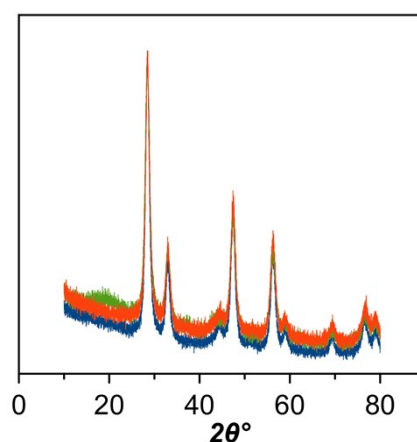

Figure S1. Reproduction of X-ray diffraction patterns of Ce–Ni oxide system obtained by glycine-nitrate combustion at  $\varphi=2$  with a covering.

Table S2. The actual NiO content in Ce–Ni–O according to the EDX analysis.

| $\varphi$ | NiO, wt% |
|-----------|----------|
| 1.25      | 32.9     |
| 1.4       | 33.3     |
| 1.5*      | 32.8     |
| 2*        | 33.7     |

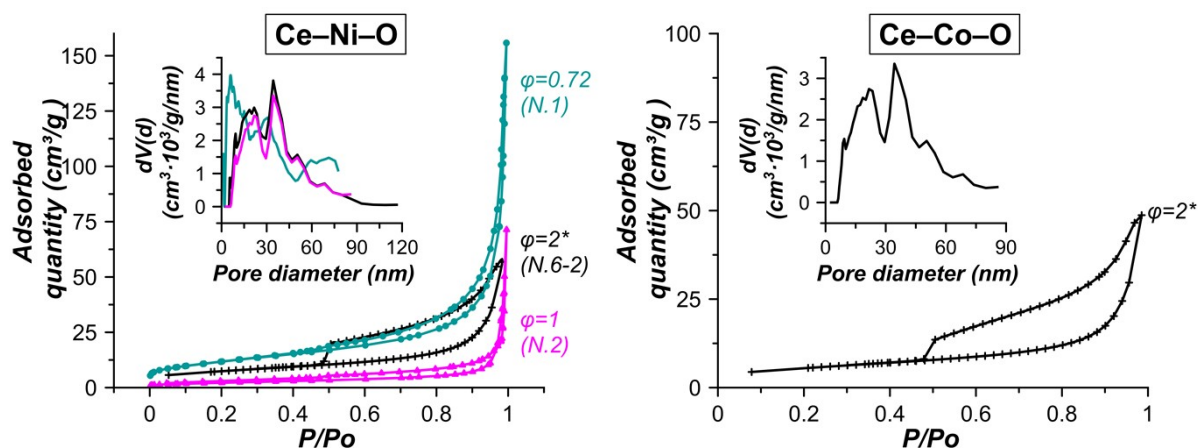

Figure S2. N<sub>2</sub> adsorption–desorption isotherms and the pore size distribution.

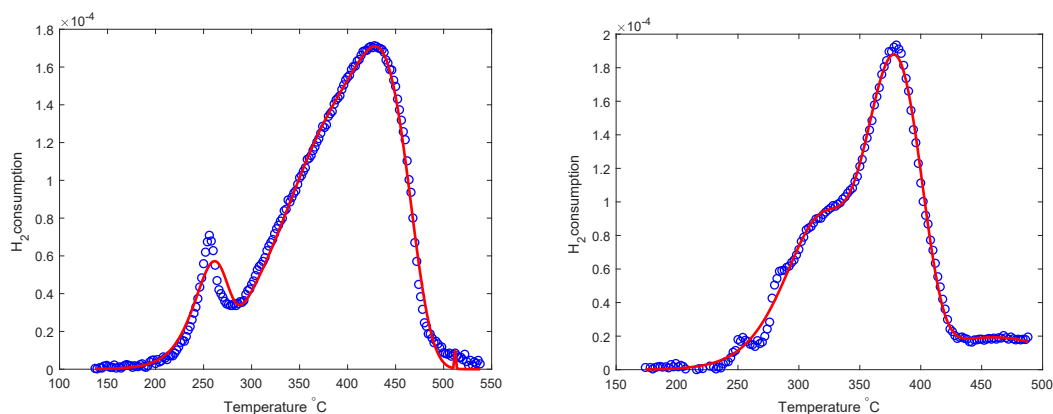

Figure S3. Modelling of TPR data for samples a) 1, b) 2 (coding of Table 1), where  $\alpha$ ,  $\beta$ ,  $\gamma$ ,  $\varepsilon$  peaks in Figure 8a correspond respectively to amorphous NiO, fine particles of nickel oxide, the same oxide strongly interacting with ceria (or large particles) and a solid solution of NiO. The values of parameters are given in Table S2.

Table S3. Values of parameters for TPR modelling. Data fitting done with ModEst software (Profmath OY).

| <b>Sample 1 (coding in Table 1)</b> |            |          |
|-------------------------------------|------------|----------|
| Parameter                           | Value      | Error, % |
| $k_{\alpha}^0$ *                    | 0.092      | 1        |
| $k_{\beta}^0$                       | 0.041      | 1        |
| $k_{\gamma}^0$                      | 38         | 1        |
| Eact, $_{\alpha}$ **                | 129 kJ/mol | 0.3      |
| Eact, $_{\beta}$                    | 71 kJ/mol  | 0.1      |
| Eact, $_{\gamma}$                   | 137 kJ/mol | 0.3      |
| $f_{\alpha}$ ***                    | 0.51       | 0.3      |
| $f_{\beta}$                         | 0.41       | 0.1      |
| $f_{\gamma}$                        | 0.08       | 1.1      |
| <b>Sample 2 (coding in Table 1)</b> |            |          |
| Parameter                           | Value      | Error, % |
| $k_{\alpha}^0$ *                    | 0.084      | >100     |
| $k_{\beta}^0$                       | 0.98       | 12.3     |
| $k_{\gamma}^0$                      | 0.134      | >100     |
| $k_{\varepsilon}^0$                 | 0.0057     | 9.8      |
| Eact, $_{\alpha}$ **                | 149 kJ/mol | >100     |
| Eact, $_{\beta}$                    | 115 kJ/mol | 2.1      |
| Eact, $_{\gamma}$                   | 139 kJ/mol | >100     |
| Eact, $_{\varepsilon}$              | 73 kJ/mol  | 29       |
| $f_{\alpha}$ ***                    | 0.49       | >100     |
| $f_{\beta}$                         | 0.21       | 15.8     |
| $f_{\gamma}$                        | 0.15       | >100     |
| $f_{\varepsilon}$                   | 0.15       | 22       |

\*Pre-exponential factor in temperature dependent reduction of the phase corresponding to  $\alpha$  peak, etc, with the mean T of 400°C.

\*\*Activation energy in temperature dependent reduction of the phase corresponding to  $\alpha$  peak, etc.

\*\*\*Fraction of the phase corresponding to  $\alpha$  peak, etc.

Table S4. H<sub>2</sub>-TPR results.

| Sample  | $\varphi$ | mmol H <sub>2</sub> /g <sub>cat</sub> | H <sub>2</sub> /Ni or H <sub>2</sub> /Co, mol/mol |
|---------|-----------|---------------------------------------|---------------------------------------------------|
| Ce-Ni-O | 0.72      | 6.0                                   | 1.3                                               |
|         | 1         | 4.9                                   | 1.1                                               |
|         | 1.5*      | 3.1                                   | 0.8                                               |
|         | 2         | 6.1                                   | 1.4                                               |
|         | 2*        | 4.9                                   | 1.2                                               |
| Ce-Co-O | 1*        | 5.1                                   | 1.2                                               |
|         | 1.5*      | 5.0                                   | 1.2                                               |
|         | 2*        | 5.7                                   | 1.6                                               |

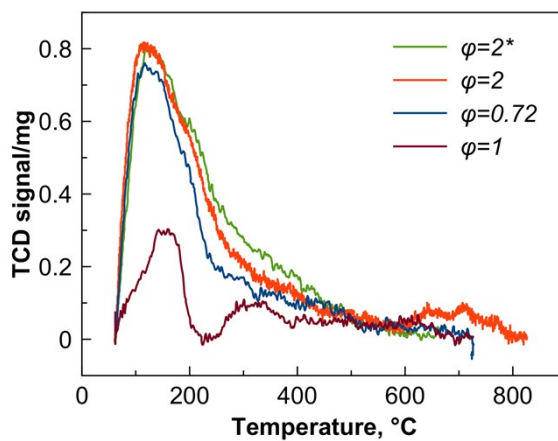

Figure S4. H<sub>2</sub>-TPD spectra for Ce-Ni-O systems prepared at different  $\phi$ .

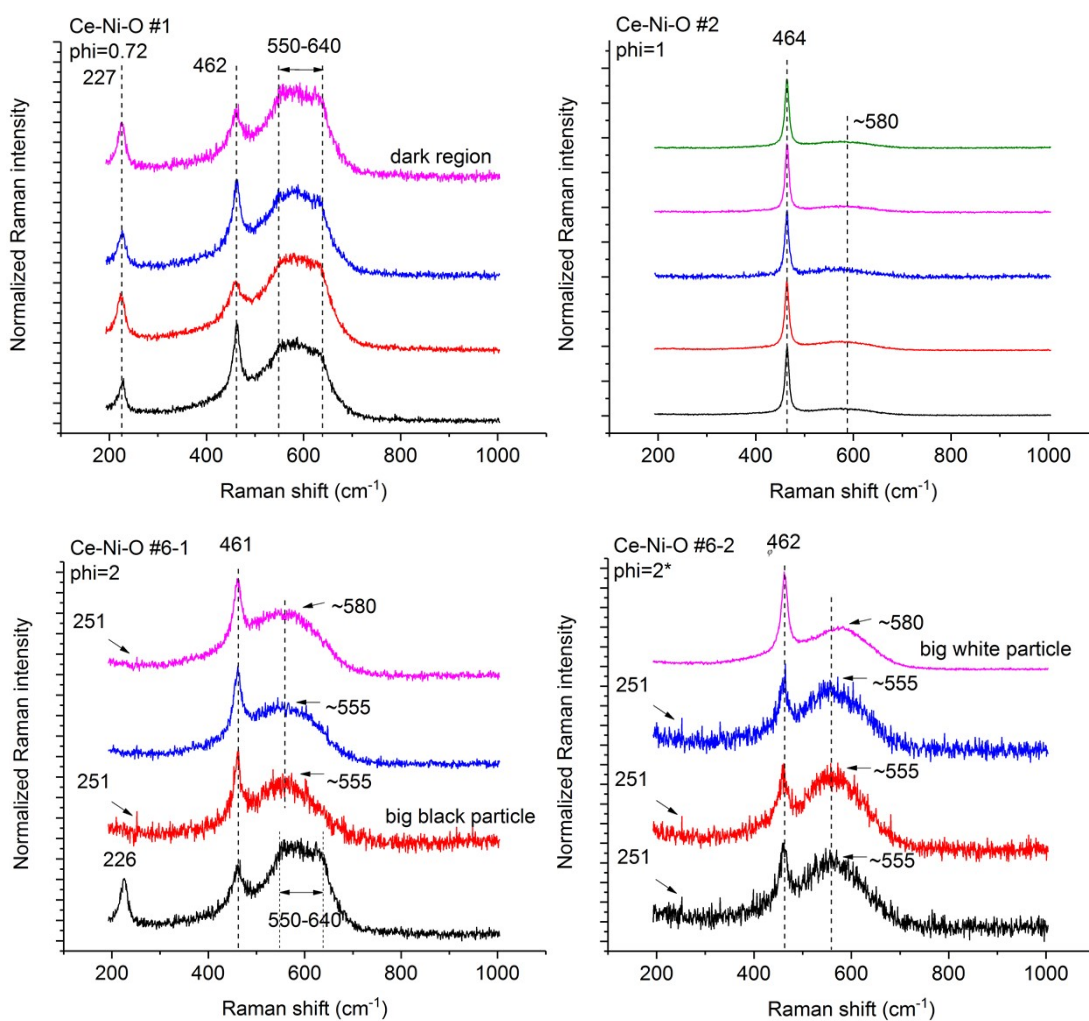

Figure S5. Raman spectra.

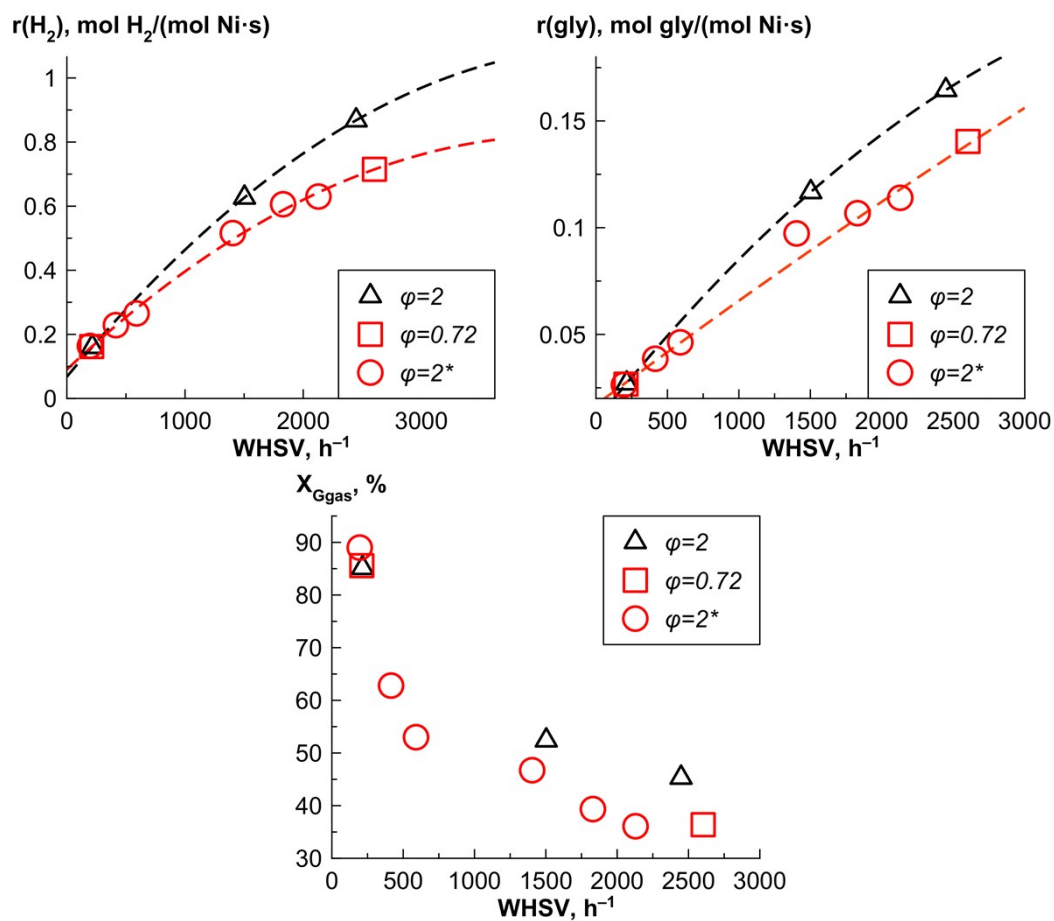

Figure S6. Dependence of the H<sub>2</sub> formation rate, glycerol (gly) transformation rate, and glycerol conversion into gaseous products on  $WHSV$  for the Ce–Ni–O systems obtained at various fuel-to-oxidizer ratios.

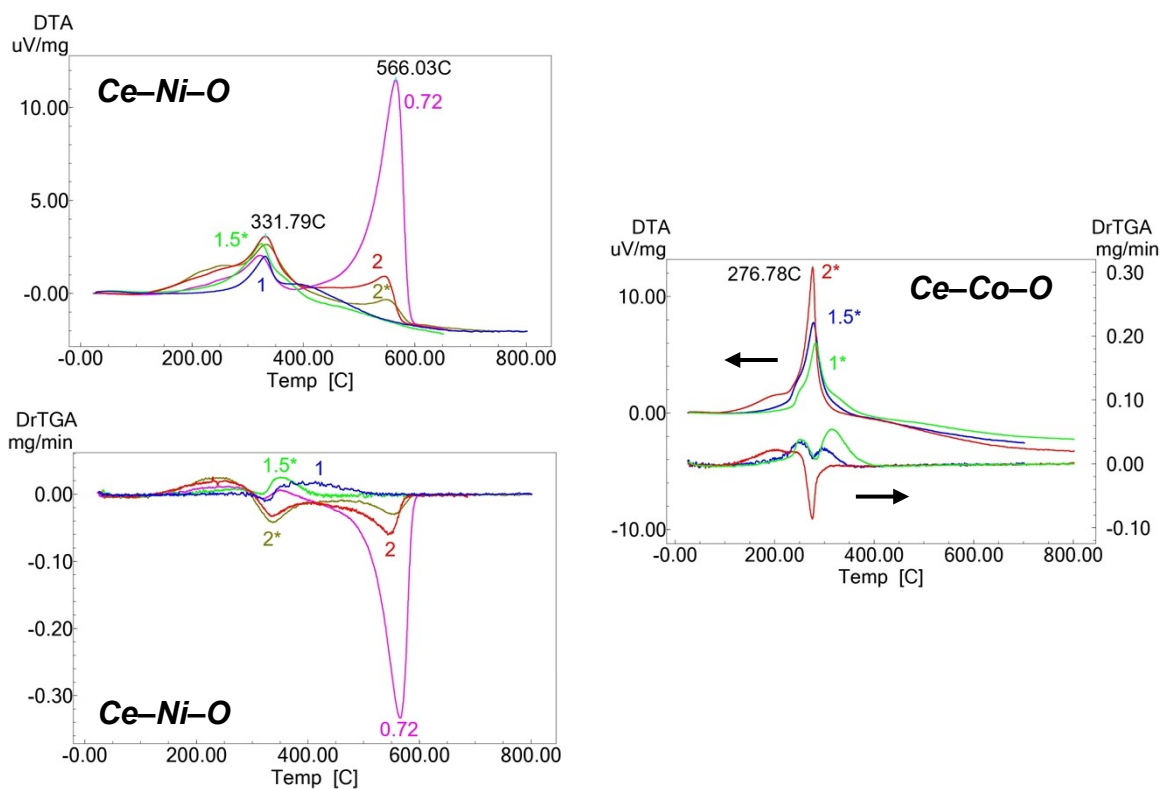

Figure S7. DTA and DTG curves for spent glycerol steam reforming catalysts. The numbers indicate the ratio of fuel-to-oxidizer.

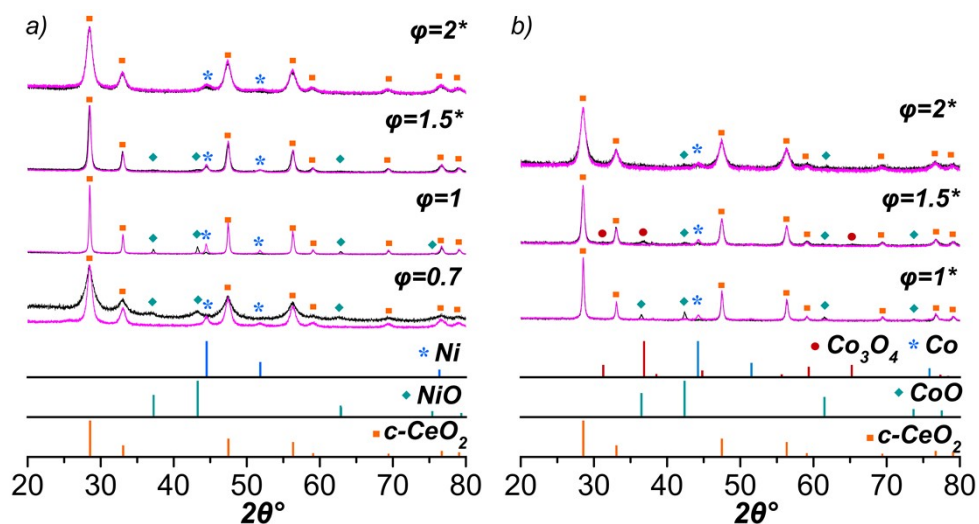

Figure S8. XRD patterns of the initial (black curves) and spent (pink curves) Ce-Ni-O (a), Ce-Co-O (b) systems obtained by the SCS method at various fuel-to-oxidizer ratios ( $\varphi$ ) (obtained using a covering).
